# Supplementary material
Source: publisher site journal article supplement (https://en-cdn.bio-protocol.org/attached/file/20210914/Supplementary%20file%20ViS4M%20Toolbox%20V1.xlsx)
Supplement: Supplementary file 1 [file Supplementary%20file%20ViS4M%20Toolbox%20V1.xlsx]

## Sheet: color toolbox
						Enter sequence in lower case below
study	mode	testing day	mouse	sex	group	color sequence	entries	% alternation	mouse		red	blue	green	white			r↔b	r↔g	r↔w	b↔g	b↔w	g↔w		mouse		r→b	r→g	r→w	b→r	b→g	b→w	g→r	g→b	g→w	w→r	w→b	w→g		mouse	4-arm sequences		4-arm alternation	3-arm alternation	2/3-arm alternation	2-arm alternation	mouse	4-arm alternations		Path ❶
color	RH	2021-05-04	M1	M	wt	wrbwgrgrwrbgrwbgrgwbr	20	50	M1	% entries	35	20	25	20		% bidirectional transitions	15	30	20	10	15	10		M1	% unidirectional transitions	10	10	10	5	10	5	20	0	5	10	10	5		M1	18	4-arm sequence type	50	11.1111	33.3333	5.55556	M1	9	% alternation path	11.1111
[truncated: 2 more columns]

## Sheet: contrast toolbox
						Enter sequence in lower case below
study	mode	testing day	mouse	sex	group	contrast sequence	entries	% alternation	mouse		clear	black	grey	white			c↔b	c↔g	c↔w	b↔g	b↔w	g↔w		mouse		c→b	c→g	c→w	b→c	b→g	b→w	g→c	g→b	g→w	w→c	w→b	w→g		mouse	4-arm sequences		4-arm alternation	3-arm alternation	2/3-arm alternation	2-arm alternation	mouse	4-arm alternations		Path ❶
			M1			wcbwgcgcwcbgcwbgcgwbc	20	50	M1	% entries	35	20	25	20		% bidirectional transitions	15	30	20	10	15	10		M1	% unidirectional transitions	10	10	10	5	10	5	20	0	5	10	10	5		M1	18	4-arm sequence type	50	11.1111	33.3333	5.55556	M1	9	% alternation path	44.4444
[truncated: 2 more columns]
